# Supplementary material for: Relationship between acromial morphological variation and subacromial impingement: A three-dimensional analysis
Source: PubMed Central journal article supplement (PMC5404845; doi:10.1371/journal.pone.0176193), 2017-04-25
Supplement: pone.0176193.s001.pdf [file pone.0176193.s001.pdf]

# Institutional Review Board Approval

Applicant: Chen Hong

Project name: Relationship between acromial morphological variation and subacromial impingement syndrome

Applicant date: 2014.2.26

Issue date: 2014.3.1

After reviewed by the institutional review board (IRB) of the first affiliated hospital of Chongqing medical university, the above project is approved to be conducted. IRB number: 20140312.

IRB of the first affiliated hospital of Chongqing medical university

2014.3.1
