# Supplementary material for: Relationship between acromial morphological variation and subacromial impingement: A three-dimensional analysis
Source: PubMed Central journal article supplement (PMC5404845; doi:10.1371/journal.pone.0176193), 2017-04-25
Supplement: pone.0176193.s002.pdf [file pone.0176193.s002.pdf]

# 重庆医科大学附属第一医院伦理委员会 审批意见书

申请人：陈虹

申请审批项目名称：肩峰形态与肩峰下撞击综合征的相关性研究

审查日期：2014. 2. 26

批准日期：2014. 3. 1

本项目所提交的资料经伦理委员会审查，符合伦理要求，同意实施。

批准号：20140312。

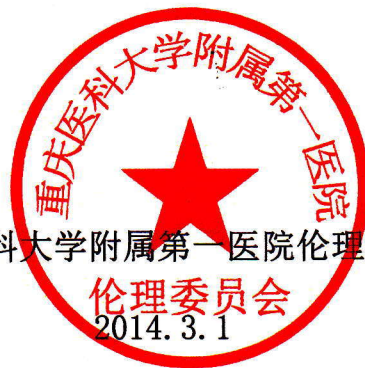

重庆医科大学附属第一医院伦理委员会

伦理委员会  
2014.3.1
